# Supplementary material for: Metal ion redox potential plays an important role in high-yield synthesis of monodisperse silver nanoparticles
Source: Royal Society of Chemistry journal article supplement (doi:10.1039/c2cc18152e), 2012-01-01
Supplement: c2cc18152e.pdf [file c2cc18152e.pdf]

## Supporting Information

### Metal Ion Redox Potential Plays an Important Role in High-Yield Synthesis of Monodisperse Silver Nanoparticles

Lun Li, Feng Hu, Dongying Xu, Shuling Shen, and Qiangbin Wang\*

Table S1. Statistical results of average diameter for the samples A-F in Figure S1.

|   | Average diameter (nm) | Standard deviation (SD) |
|---|-----------------------|-------------------------|
| A | 3.9±0.1               | 2.56%                   |
| B | 3.9±0.1               | 2.56%                   |
| C | 4.0±0.15              | 3.75%                   |
| D | 6±5.2                 | 86.67%                  |
| E | 8±4.7                 | 58.75%                  |
| F | 4.5±2.1               | 46.33%                  |

300 particles were measured to get the size distribution.

Table S2. The corresponding results of AgNPs obtained with  $\text{Fe}^{3+}$  (A\*) and without  $\text{Fe}^{3+}$  (B\*) catalyzing in UV-Vis measurements of Figure 2B.

|                                 |                        | 120 °C  | 160 °C  | 200 °C  |
|---------------------------------|------------------------|---------|---------|---------|
| A*:<br>OA+OAM+ $\text{Fe}^{3+}$ | $I_{\text{peak}}$      | 0.66933 | 0.99951 | 1.06879 |
|                                 | $\lambda_{\text{max}}$ | 412 nm  | 412 nm  | 412 nm  |
|                                 | FWHM                   | 85 nm   | 78 nm   | 75 nm   |
| B*:<br>OA+OAM                   | $I_{\text{peak}}$      | 0.09210 | 0.59324 | 0.87793 |
|                                 | $\lambda_{\text{max}}$ | 419 nm  | 421 nm  | 414 nm  |
|                                 | FWHM                   | 105 nm  | 103 nm  | 86 nm   |

The volumes of OA and OAM used in the reaction were both 10 mL. The amount of  $\text{Fe}^{3+}$  added was 0.1 mmol. FWHM = full width at half maximum.  $I_{\text{peak}}$  was the intensity of the absorption peak.

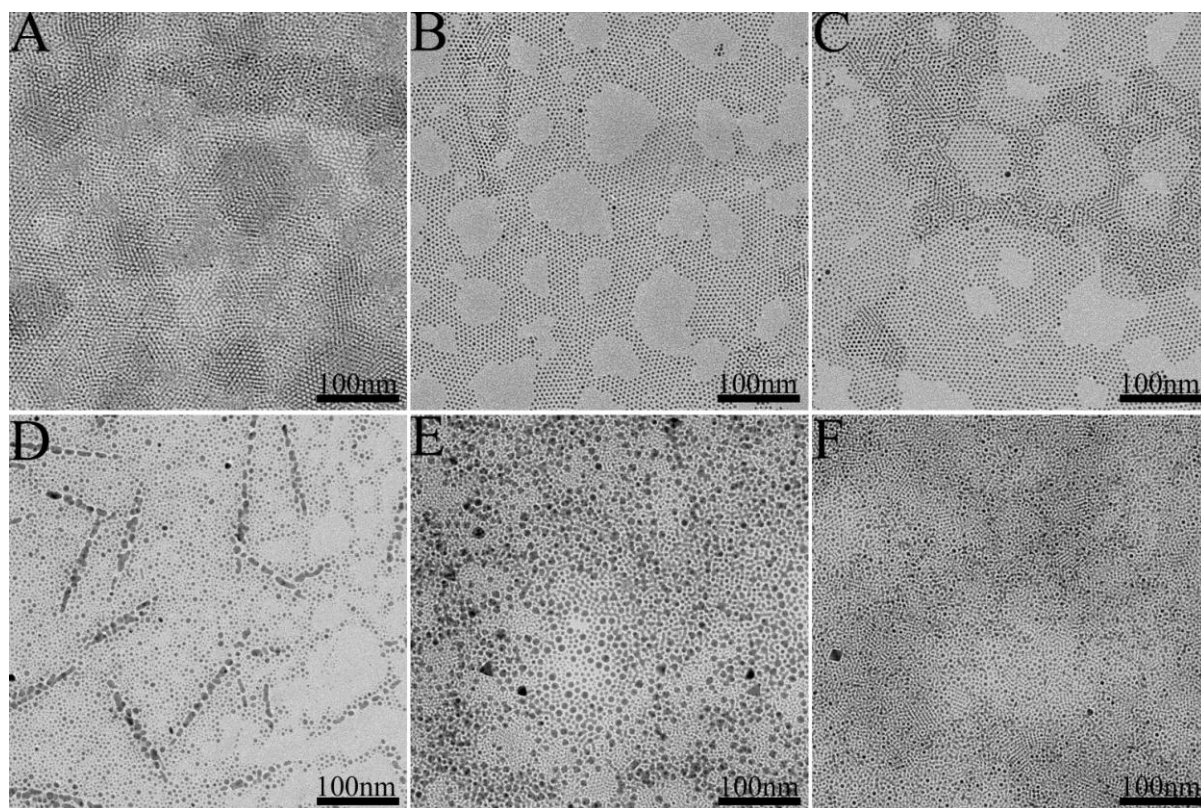

Figure S1. TEM images of AgNPs obtained with or without adding  $\text{Fe}^{3+}$  ions at different reaction temperatures. A-C: 120 °C, 160 °C, and 200 °C with adding  $\text{Fe}^{3+}$  ions; D-F: 120 °C, 160 °C, 200 °C without adding  $\text{Fe}^{3+}$  ions, respectively. The volumes of OA and OAM used in the reaction were both 10 mL.

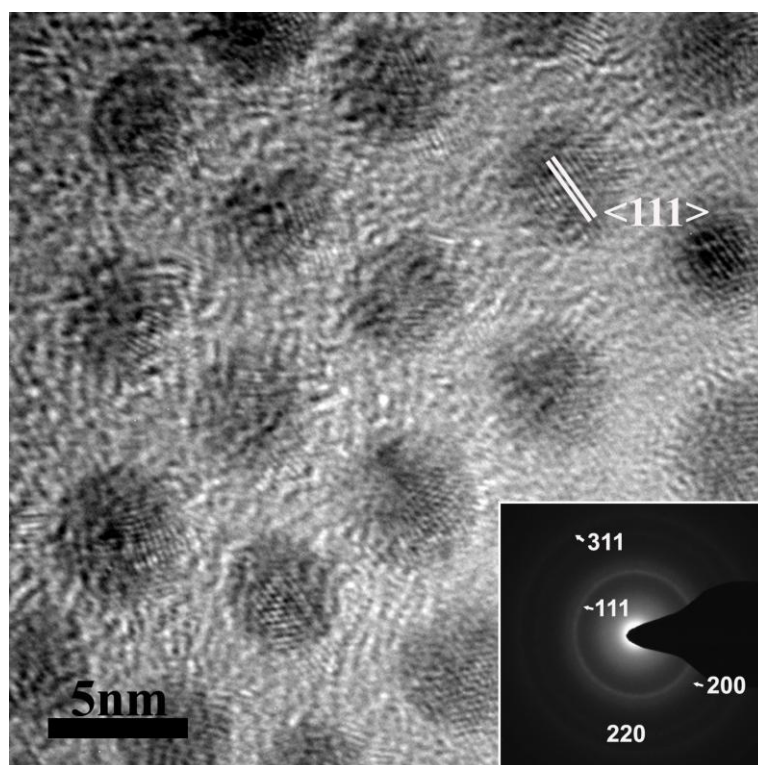

Figure S2. HR-TEM image of the as-prepared AgNPs with addition of  $\text{Fe}^{3+}$  in the reaction at 120 °C. It was found that most of the AgNPs were polycrystalline. Inset showed selected area electron diffraction (SAED) patterns of the as-prepared 4-nm sized AgNPs.

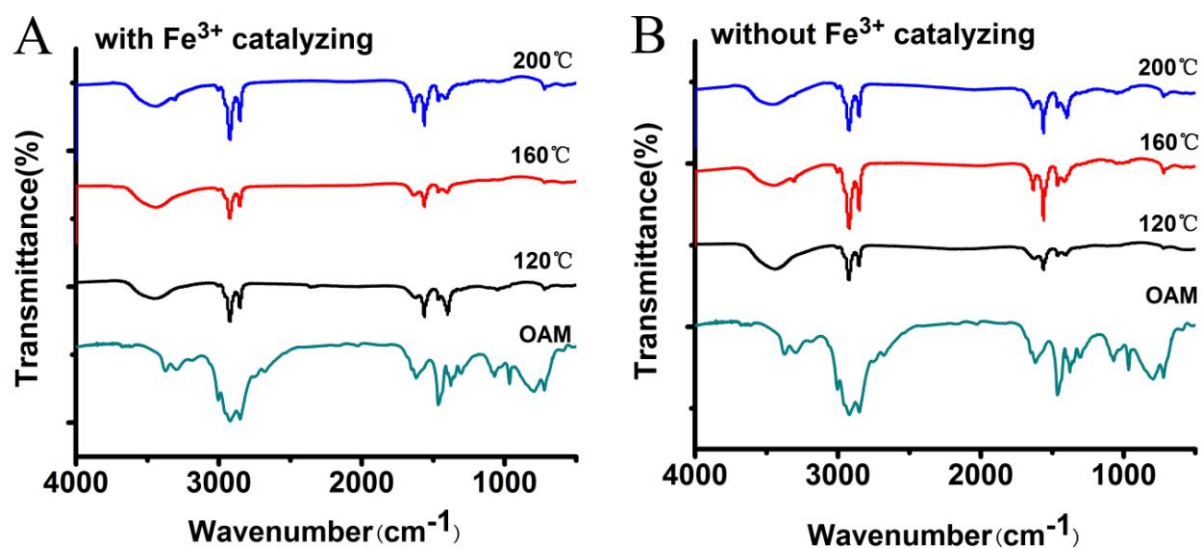

Figure S3. Fourier transform infrared spectrometer (FTIR) spectra of the AgNPs. A: with adding Fe<sup>3+</sup>; B: without adding Fe<sup>3+</sup>. The volumes of OA and OAM used in the reaction were both 10 mL for all samples.

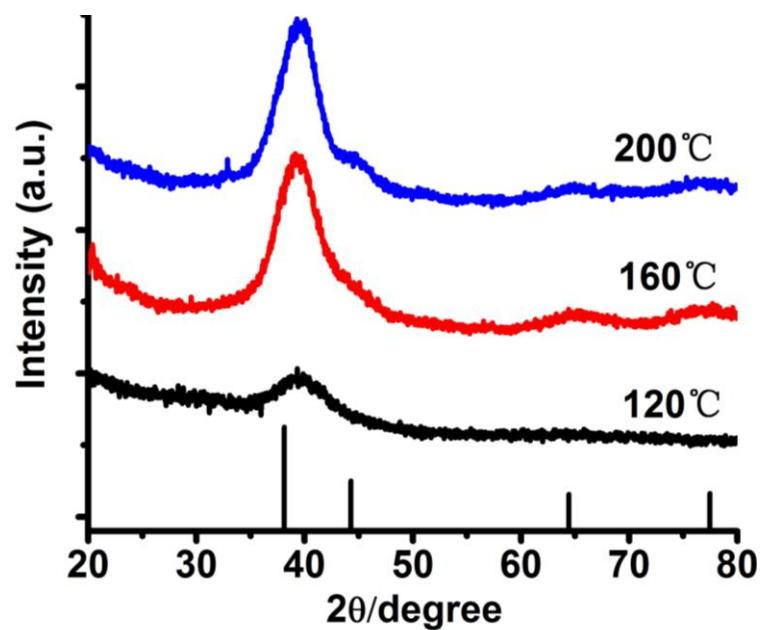

Figure S4. XRD patterns of the AgNPs without adding  $\text{Fe}^{3+}$  at three different reaction temperatures under  $\text{N}_2$  atmosphere. The volume of OA and OAM used in the reaction were both 10 mL for all samples.

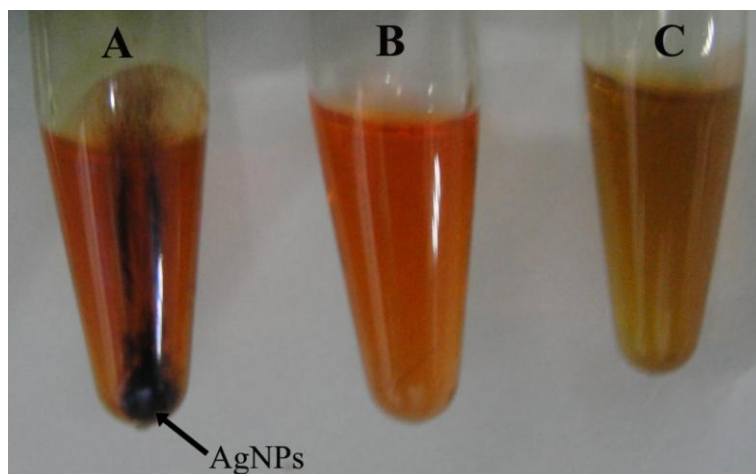

Figure S5. Determination of  $\text{Fe}^{2+}$  ions in the reaction employing the standard 1,10-phenanthroline spectrophotometry method. Once there are  $\text{Fe}^{2+}$  ions in the solution, the intrinsic orange-red color of the  $\text{Fe}^{2+}$ -1,10-phenanthroline complex will be observed by adding 1,10-phenanthroline into the solution. A: Optical picture of the 1,10-phenanthroline coordinated supernatant of the reaction system at the end of AgNPs synthesis with adding  $\text{Fe}^{3+}$  at 120 °C. 100  $\mu\text{L}$  of the resulted mixture were extracted by centrifuging at 13000 rpm for 5 min with adding 200  $\mu\text{L}$  of acetic acid-sodium acetate buffer solution ( $\text{pH} \approx 4.5$ ) and 200  $\mu\text{L}$  of ethanol containing 1,10-phenanthroline (0.2 %). The intrinsic orange-red color of  $\text{Fe}^{2+}$ -1,10-phenanthroline was observed, indicating the existence of  $\text{Fe}^{2+}$ . Two control experiments were designed to confirm the conclusion. B: Only  $\text{Fe}^{3+}$  were added into the mixture of OA-OAM without addition of  $\text{AgNO}_3$  while keeping other parameters same, orange-red color was observed. C: only  $\text{AgNO}_3$  was added into the mixture of OA-OAM without addition of  $\text{Fe}^{3+}$  while keeping other parameters same, no orange-red color was observed.

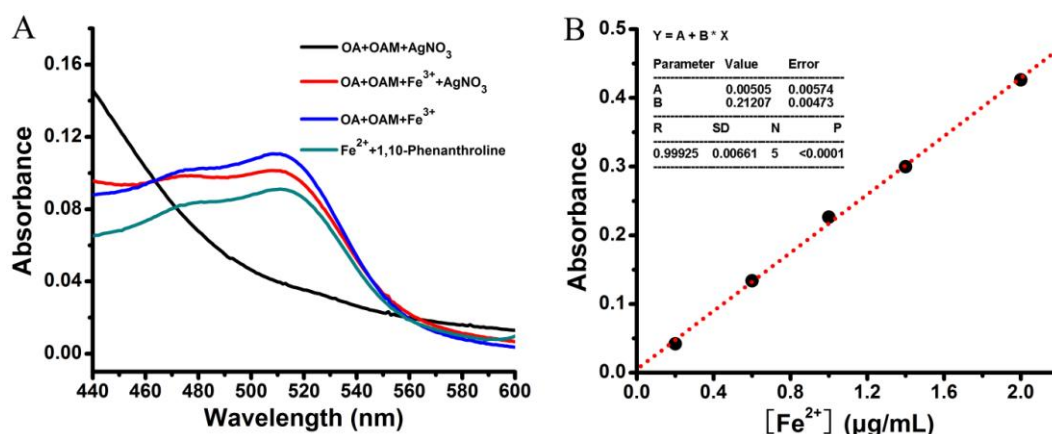

Figure S6. Determination of the concentration of  $\text{Fe}^{2+}$  by 1,10-phenanthroline using UV-Vis spectrometry. A: UV-Vis spectra of the  $\text{Fe}^{2+}$ -1,10-phenanthroline complexes of different reactions. The characteristic absorption feature of  $\text{Fe}^{2+}$ -1,10-phenanthroline was presented in the region of 500-520 nm; B: Calibration curve of the concentration of  $\text{Fe}^{2+}$  ions was determined by choosing the absorbance peak intensity at  $\lambda=510\text{nm}$ .

According to Figure S6A, the peak intensity at  $\lambda=510\text{nm}$  for system with adding  $\text{AgNO}_3$  ( $I_1, \lambda_{510\text{nm}}$ ) and without adding  $\text{AgNO}_3$  ( $I_2, \lambda_{510\text{nm}}$ ) in the presence of  $\text{Fe}^{2+}$  were 0.10129 and 0.11048, respectively. So, the resulted concentration of  $\text{Fe}^{2+}$  for the reaction system with adding  $\text{AgNO}_3$  ( $c_1$ ) and without adding  $\text{AgNO}_3$  ( $c_2$ ) were calculated as following:

$$c_1 = \frac{(0.10129 - 0.00505)}{0.21207} \times 12.5 = 5.6727 \mu\text{g/mL};$$

$$c_2 = \frac{(0.11048 - 0.00505)}{0.21207} \times 12.5 = 6.2143 \mu\text{g/mL};$$

The value 12.5 presented volume dilution times for the initial  $[\text{Fe}^{2+}]$ . The conversion efficiency of  $\text{Fe}^{3+} \rightarrow \text{Fe}^{2+}$  for the system with adding  $\text{AgNO}_3$  ( $w_1$ ) and without  $\text{AgNO}_3$  ( $w_2$ ) in the presence of  $\text{Fe}^{2+}$  were:

$$w_1 = \frac{5.6727 \times 10^{-6} \text{ g/mL} \times 20 \text{ mL}}{55.8457 \text{ g/mol} \times \left( \frac{0.04 \text{ g}}{404 \text{ g/mol}} \right)} \times 100\% = 2.03\%$$

$$w_2 = \frac{6.2143 \times 10^{-6} \text{ g/mL} \times 20 \text{ mL}}{55.8457 \text{ g/mol} \times \left( \frac{0.04 \text{ g}}{404 \text{ g/mol}} \right)} \times 100\% = 2.23\%$$

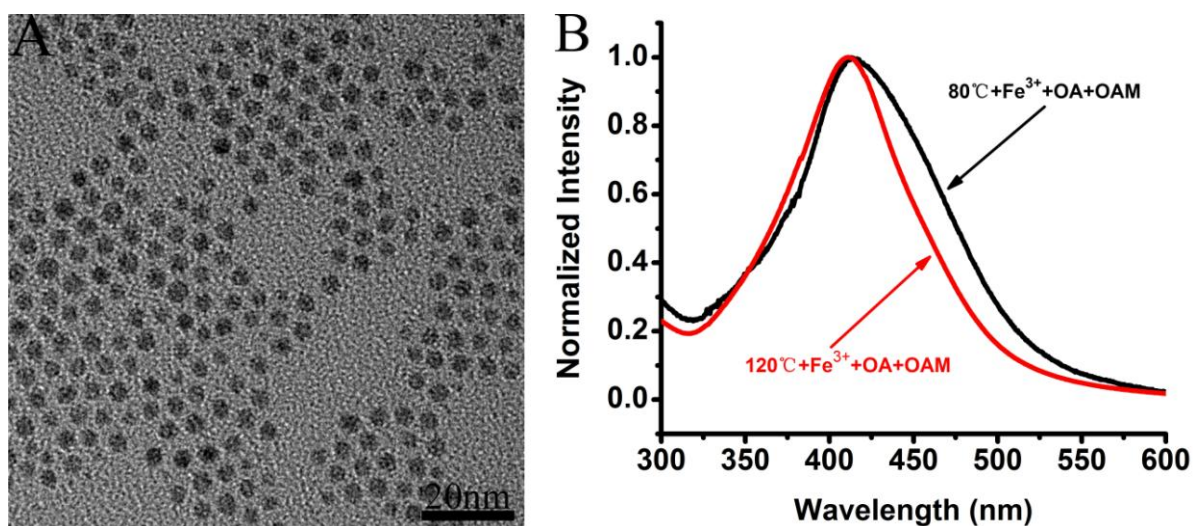

Figure S7. TEM image (A) and UV-Vis spectra (B) of the AgNPs at 80 °C with adding  $\text{Fe}^{3+}$  ions. The size distribution was calculated by measuring 300 particles to be  $4.0 \pm 0.1$  nm in diameter. The peak position in UV-Vis spectrum is  $\lambda_{\text{max}} = 413$  nm with FWHM  $\sim 95$  nm. The volumes of OA and OAM used in the reaction were both 10 mL for all samples at  $\text{N}_2$  atmosphere.

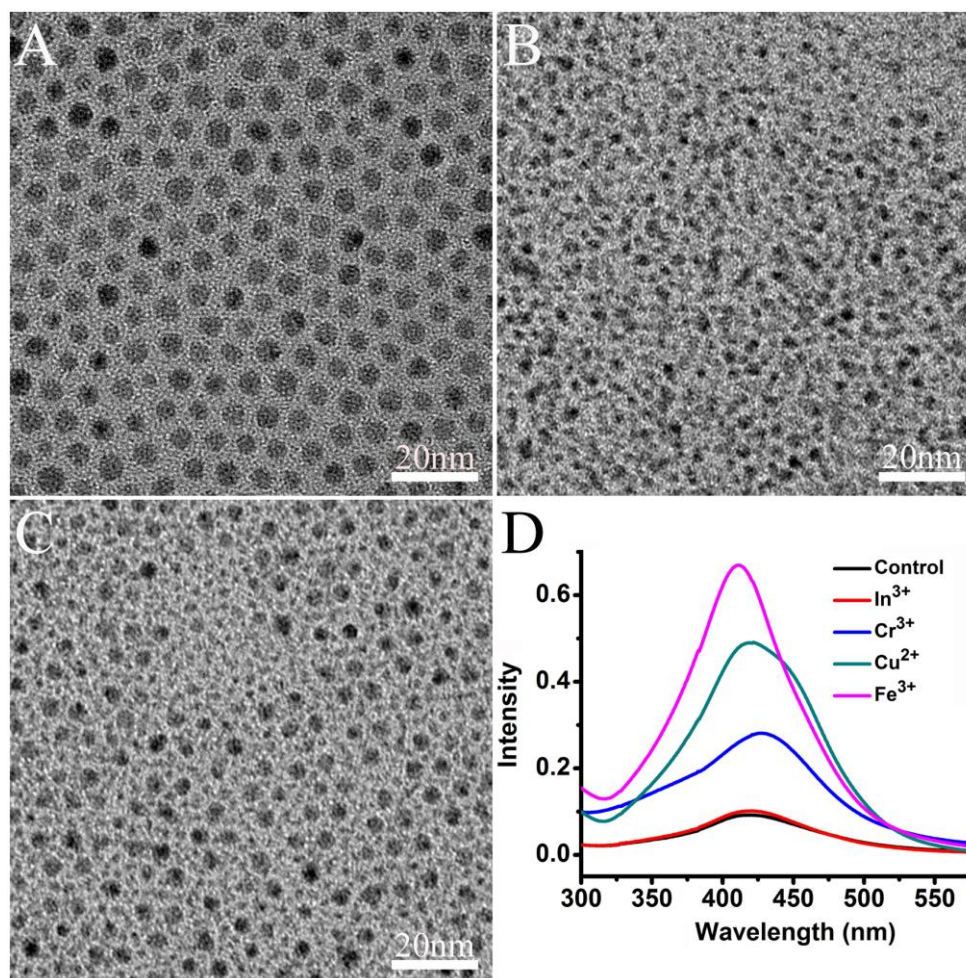

Figure S8. TEM images (A-C) and UV-vis spectra (D) of the AgNPs catalyzed with different metal ions at 120 °C. A:  $\text{Cu}^{2+}$  ions; B:  $\text{Cr}^{3+}$  ions; C:  $\text{In}^{3+}$  ions. As shown in Figure S5A, the reaction with addition of  $\text{Cu}^{2+}$  ions produced monodispersed AgNPs with the diameter of 6 nm and size distribution of 9 %, whereas the reactions added with  $\text{Cr}^{3+}$  and  $\text{In}^{3+}$  ions did not provide uniform AgNPs but some smaller NPs in wide size distributions (Figures S5B and S5C, Table S3). The UV-Vis spectra in Figure S5D presented the relative yield of AgNPs and their sizes and size distributions from the reactions with addition of  $\text{Cu}^{2+}$ ,  $\text{Cr}^{3+}$  and  $\text{In}^{3+}$  ions under the same conditions, respectively. It was observed that the  $\text{Cu}^{2+}$  ions significantly improved the yield of AgNPs in comparison with the reaction without adding any metal ions, although the yield was a little lower than that of the reaction with addition of  $\text{Fe}^{3+}$  ions. For the reaction with adding  $\text{Cr}^{3+}$  ions, a weakened catalytic effect on the production of AgNPs was observed, while the addition of  $\text{In}^{3+}$  ions did not improve the yield of AgNPs. In the meantime, the FWHMs of the UV-Vis spectra depicted that the quality of the AgNPs from the reaction catalyzed by  $\text{Cu}^{2+}$  ions was better than those of adding  $\text{Cr}^{3+}$  and  $\text{In}^{3+}$  in terms of the size distribution.

We reasoned that the redox potential of the metal ion played the vital role in determining the yield and quality of AgNPs. The redox potential of  $\text{Cu}^{2+}/\text{Cu}^{+}$  is +0.16 V which is higher than that of  $\text{Cr}^{3+}/\text{Cr}^{2+}$  (-0.41 V) and  $\text{In}^{3+}/\text{In}^{2+}$  (-0.49 V), so in the case of adding  $\text{Cu}^{2+}$  ions in the reaction, the  $\text{Cu}^{2+}$  was reduced into  $\text{Cu}^{+}$  with accepting one electron from OAM and then the  $\text{Cu}^{+}$  donated one electron to  $\text{Ag}^{+}$  to form the Ag atom as the nucleation center of AgNPs. This circled self-catalyzing process helped to improve the yield of AgNPs. However, for the reactions with adding  $\text{Cr}^{3+}$  and  $\text{In}^{3+}$  ions, their redox potentials did not matched with that of  $\text{Ag}^{+}/\text{Ag}$  and OAM, which resulted in the circled self-catalyzing process performed in a low efficiency and thus the decreased yield of AgNPs. With regard to the size distribution of the AgNPs, the self-catalyzing circle with proper catalysts, such as  $\text{Fe}^{3+}$  and  $\text{Cu}^{2+}$  ions, promoted the kinetics contribution on the formation of AgNPs at the lower reaction temperature (120 °C), which fastened the nucleation process and further resulted in the monodispersed products. In contrast, the reactions added with  $\text{Cr}^{3+}$  and  $\text{In}^{3+}$  ions which possessed weak catalytic effect, were thermodynamically dominated and required an elongated nucleation stage at the lower reaction temperature (120 °C). The overlapped nucleation stage and growth stage of AgNPs resulted in the wide size distribution of the final products.<sup>[1-3]</sup>

Table S3. The corresponding results of AgNPs in Figure 3.

|                  | $\lambda_{\text{max}}$ | $I_{\text{peak}}$ | FWHM   | Average diameter (nm) | SD      |
|------------------|------------------------|-------------------|--------|-----------------------|---------|
| $\text{Cu}^{2+}$ | 422 nm                 | 0.491             | 106 nm | $6.0 \pm 0.55$        | 9.17 %  |
| $\text{Cr}^{3+}$ | 427 nm                 | 0.28097           | 130 nm | 2.0 ~ 7.0             | 55.56 % |
| $\text{In}^{3+}$ | 418 nm                 | 0.10125           | 101 nm | 1.8 ~ 5.5             | 50.68 % |

The volume of OA and OAM were both 10 mL. The amount of metal ions added were ~10mol % of  $[\text{Ag}^+]$ .

The redox potentials of corresponding metal ions are shown as following:

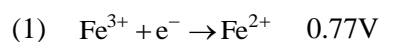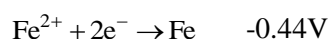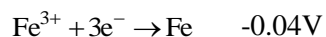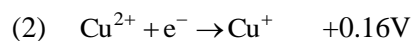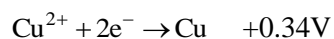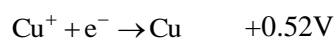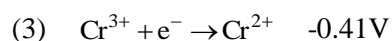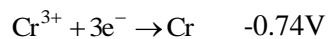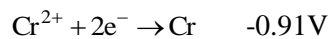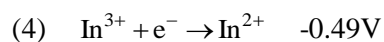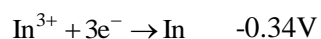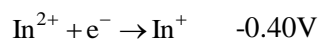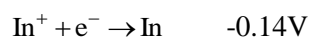

#### References:

- (1) J. Park, K. An, Y. Hwang, J.-G. Park, H.-J. Noh, J.-Y. Kim, P.J.-H. ark, N.-M. Hwang, T. Hyeon, *Nat. Mater.*, 2004, **3**, 891.
- (2) Y. Xia, Y. Xiong, B. Lim, S. E. Skrabalak, *Angew. Chem. Int. Ed.*, 2009, **48**, 60.
- (3) R. Zhang, A. Khalizov, L. Wang, M. Hu, W. Xu, *Chem. Rev.*, 2011, DOI: 10.1021/cr2001756.
